# Supplementary material
Source: PubMed Central journal article supplement (PMC3725963)

Figure S1. Linkage regions in the three geographically clusters at chromosome 14 (upper left panel), chromosome 17 (upper right panel) and chromosome 19 (lower panel). Light blue line represents Northern Europe cluster, orange line represents Southern Europe cluster, purple line represents Finland.

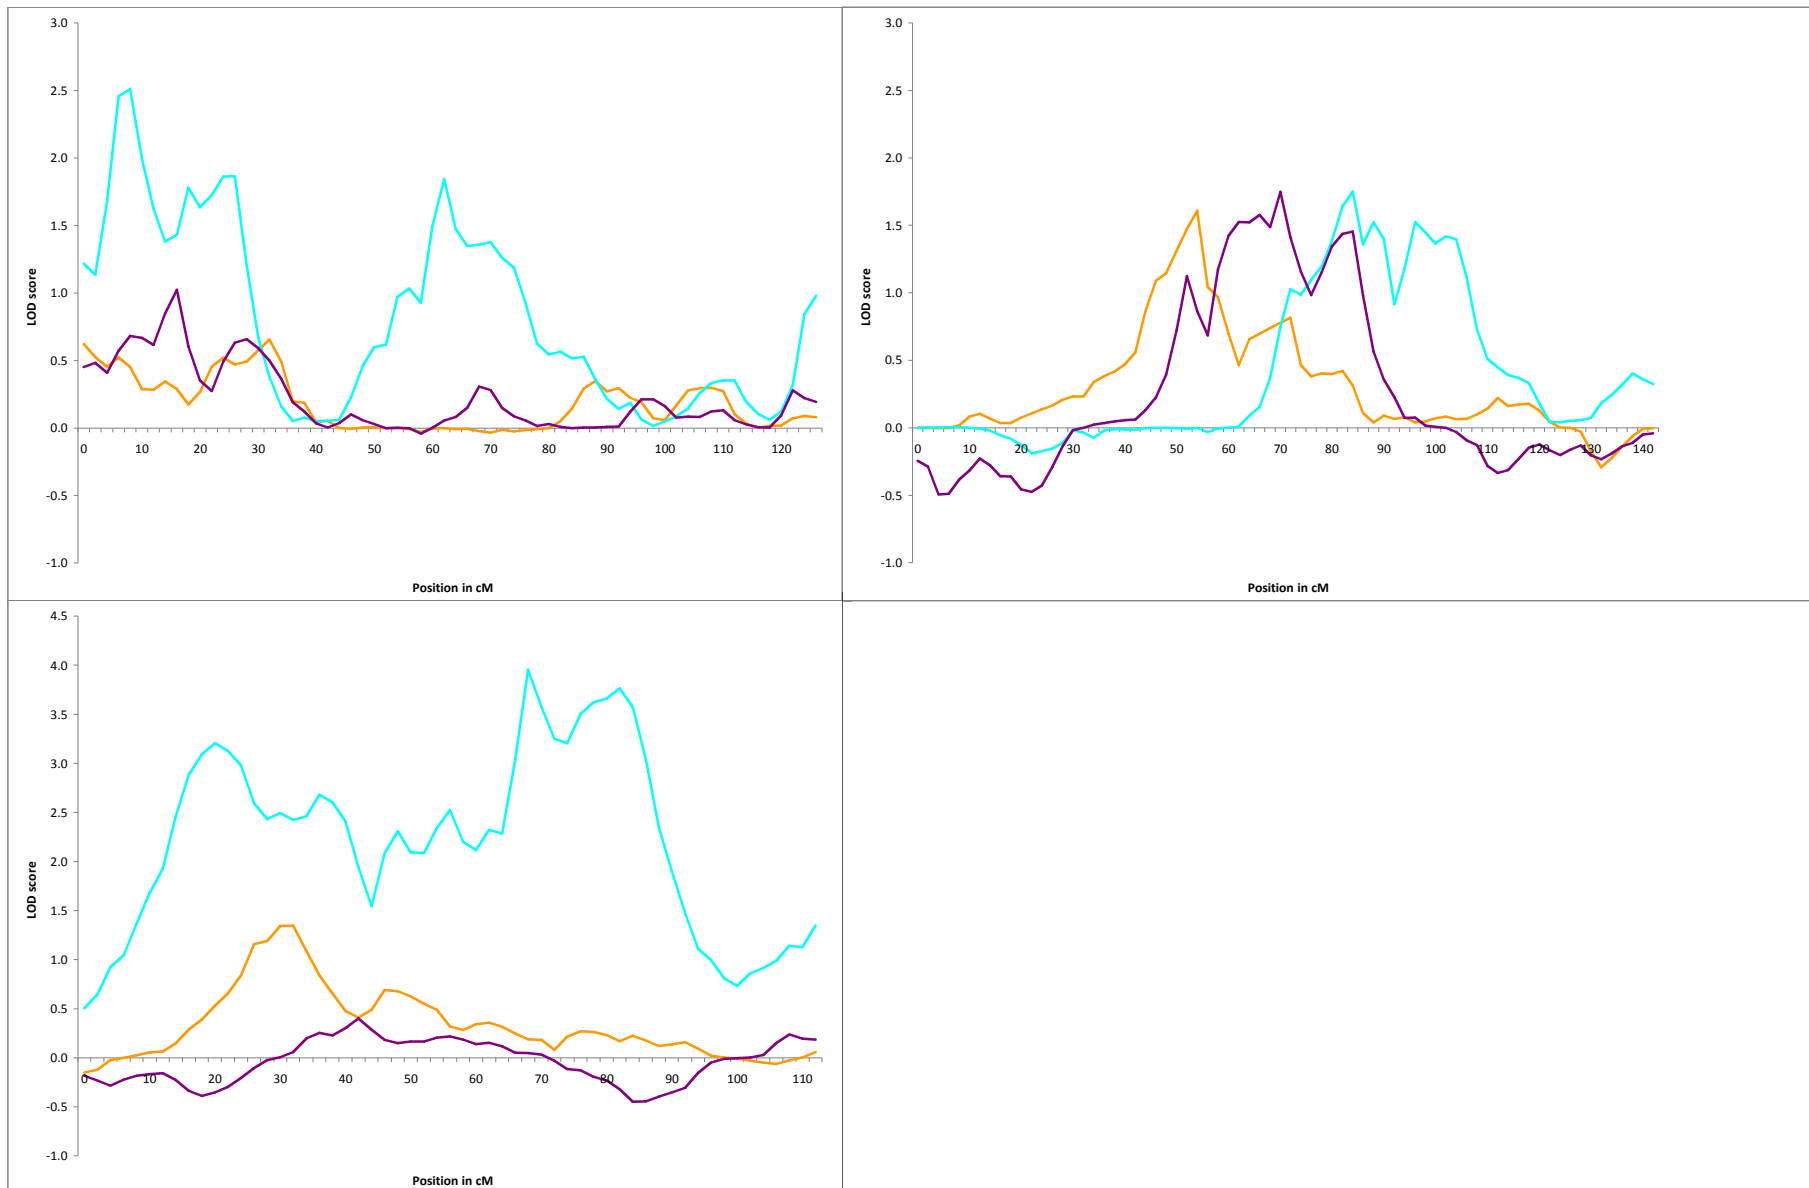

Figure S2. Sex-specific linkage regions in the three geographically clusters. Light blue line represents Northern Europe cluster, orange line represents Southern Europe cluster, purple line represents Finland. Left upper corner shows chromosome 8 in male-only sibpairs. Right upper corner shows chromosome 15 in female-only sibpairs. Left lower corner shows chromosome 19 in female-only sibpairs.

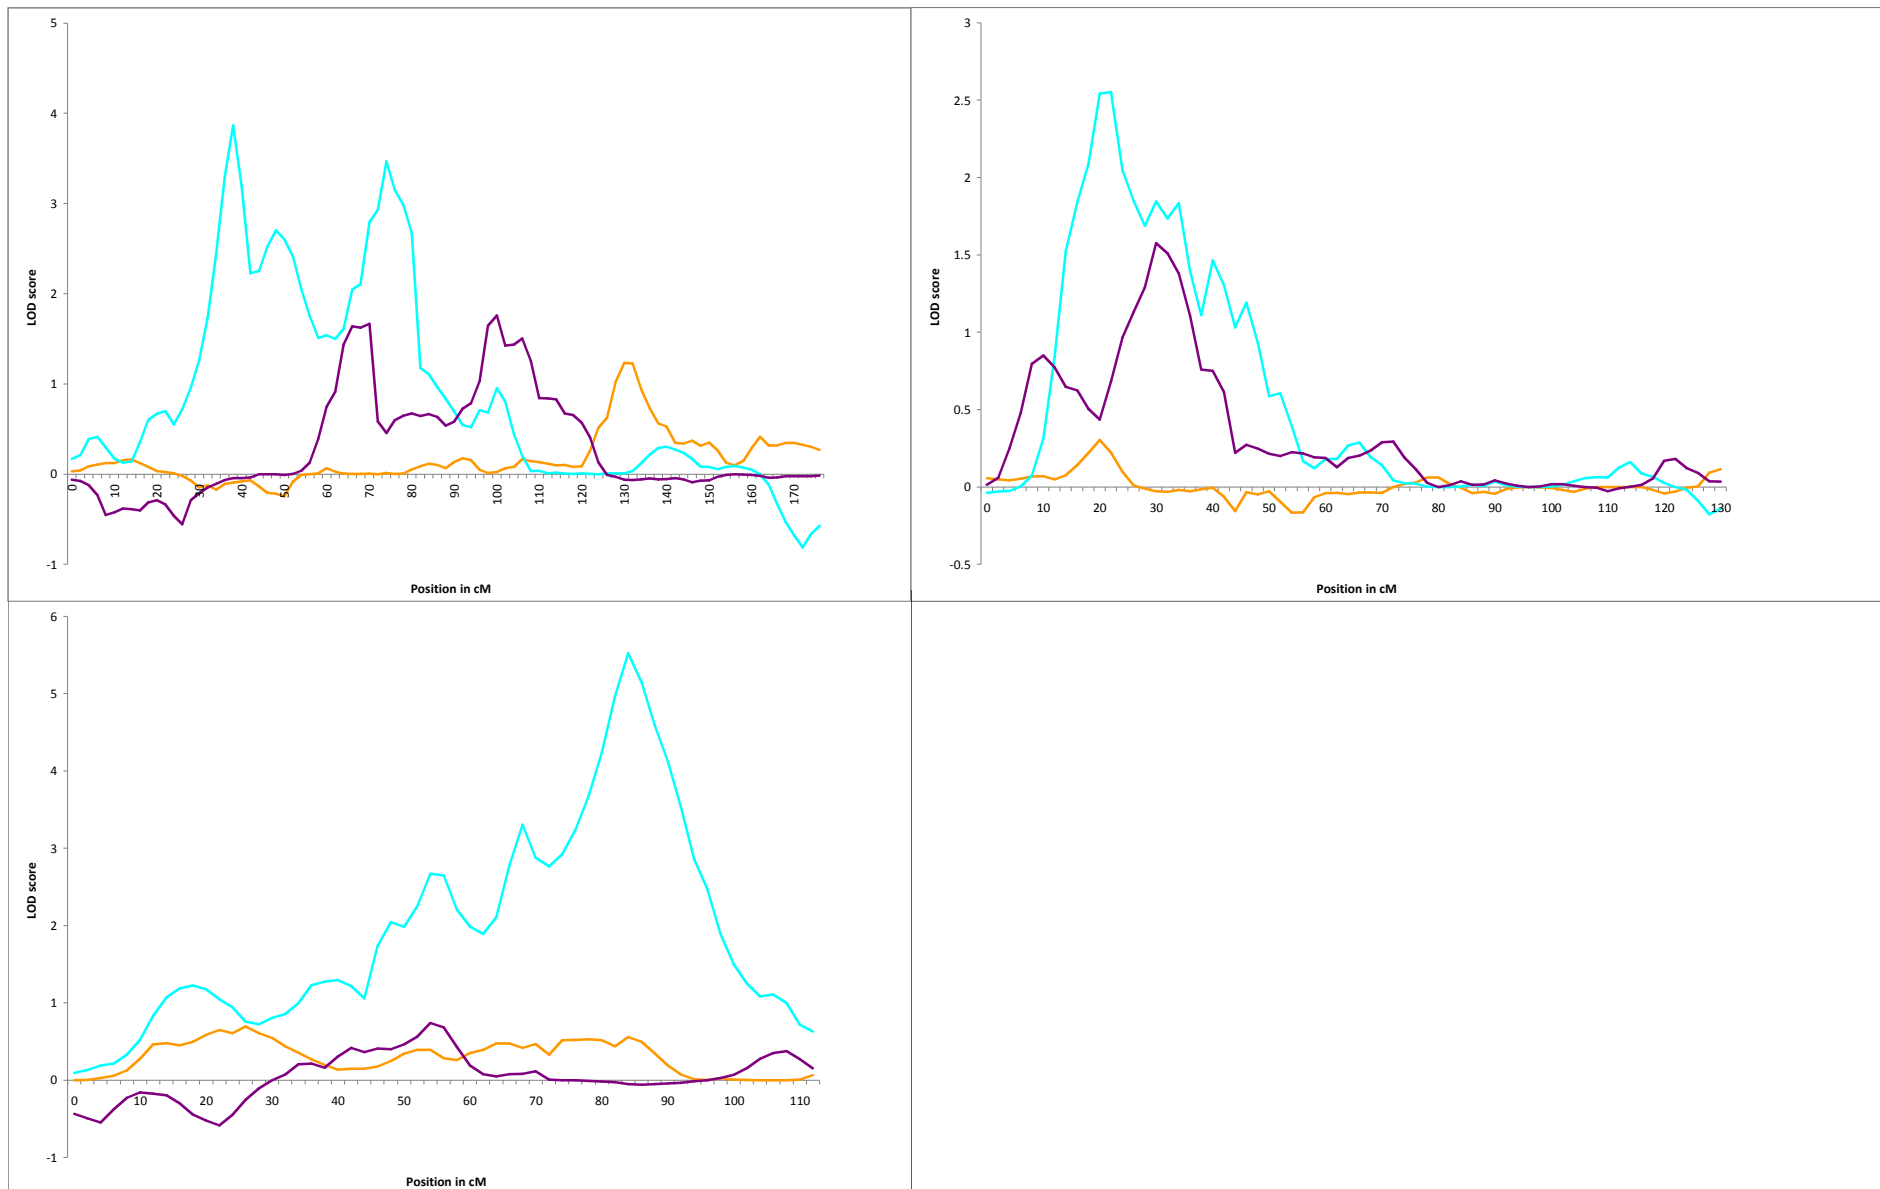

Figure S3. Linkage at chromosome 19 for the three largest centers from the Northern European cluster. Blue line represents Denmark, green line represents The Netherlands, red line represents France.

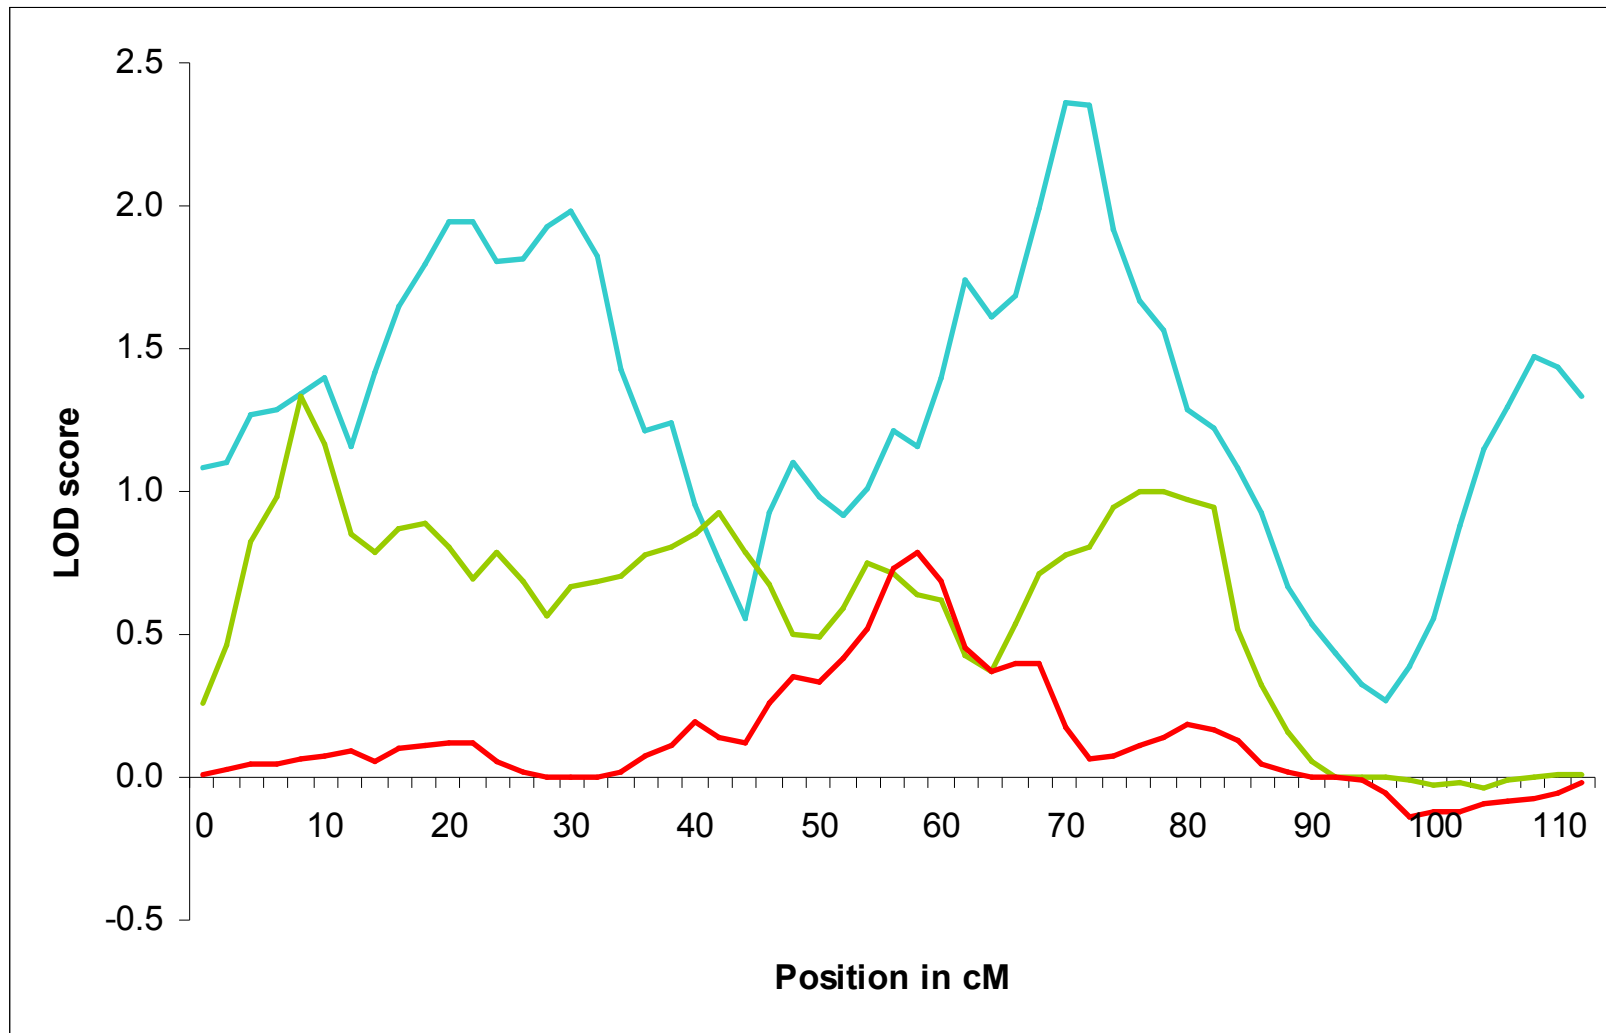

Supplement: NIHMS430189-supplement-Supp_Fig_S1-S3.pdf [file NIHMS430189-supplement-Supp_Fig_S1-S3.pdf]
