# Supplementary material
Source: PubMed Central journal article supplement (PMC3725963)

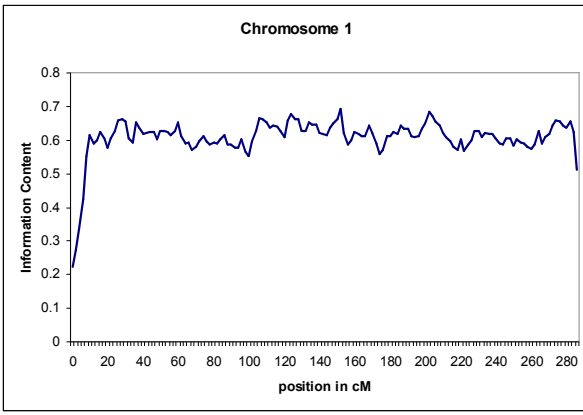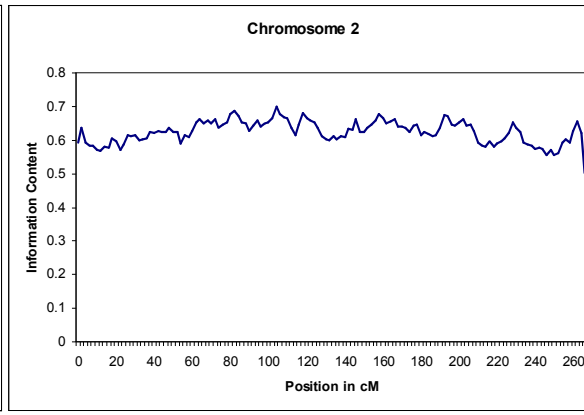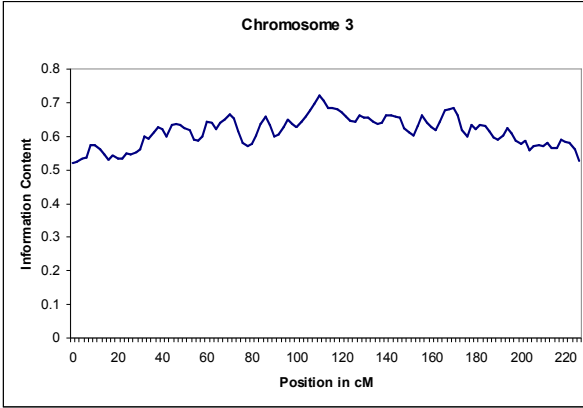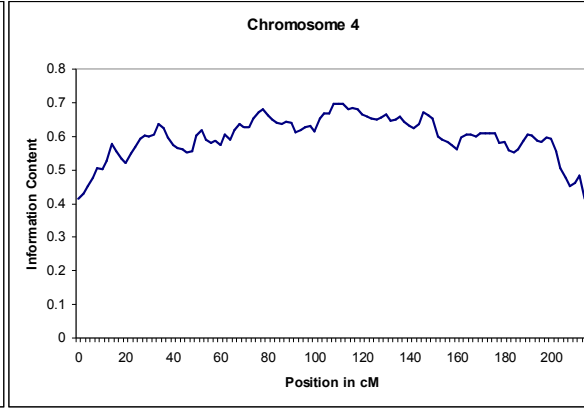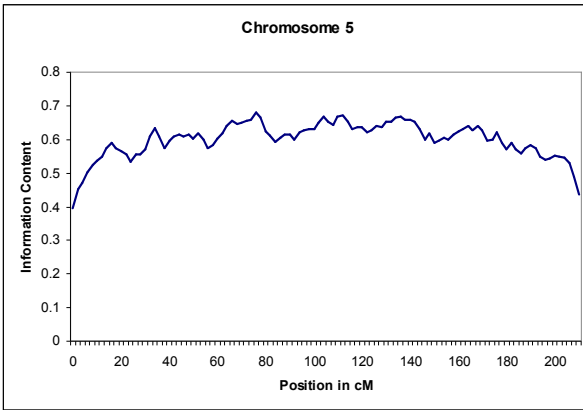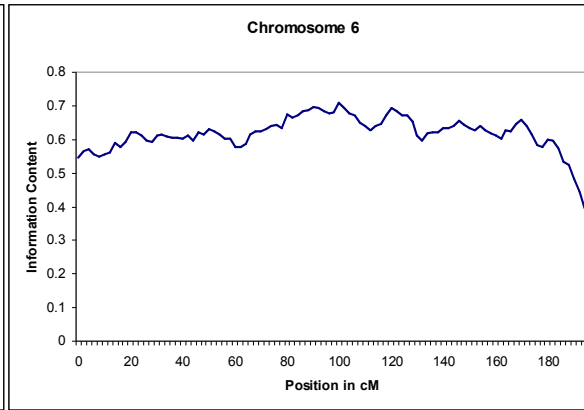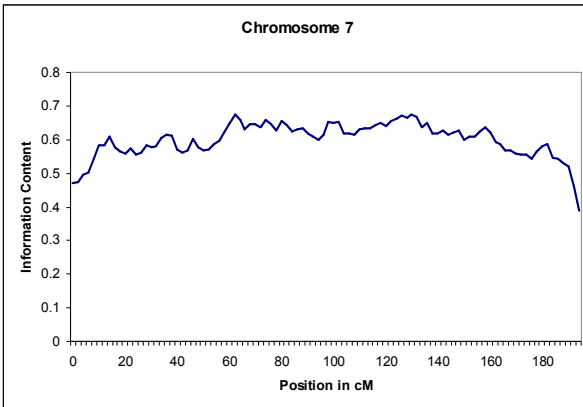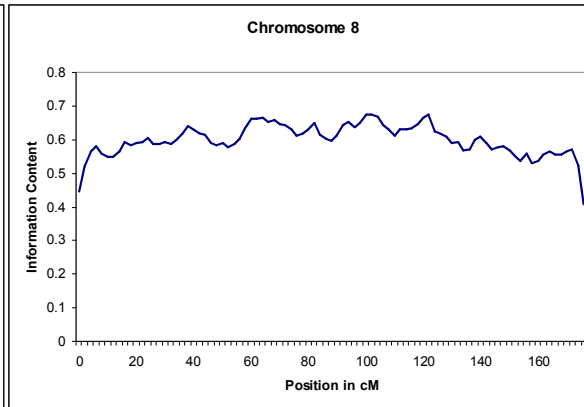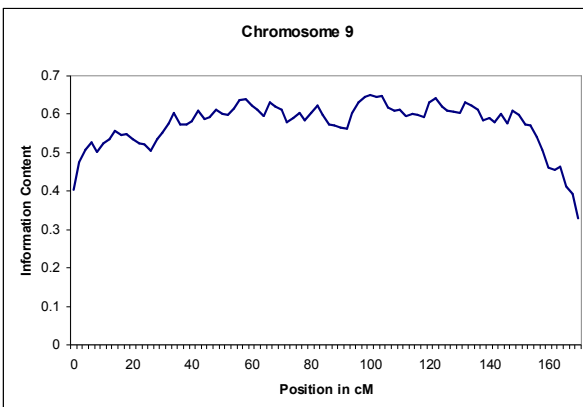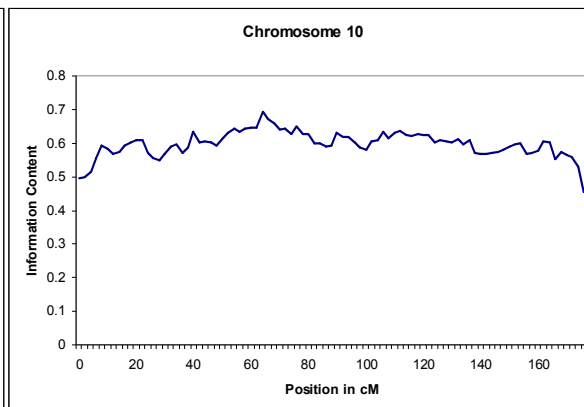

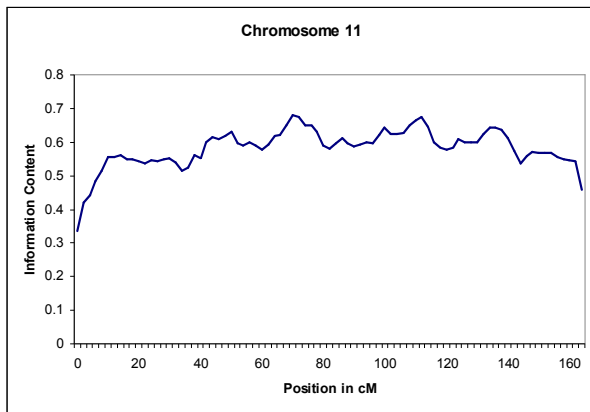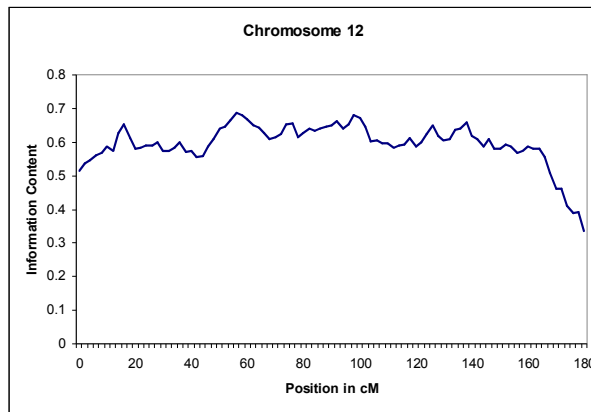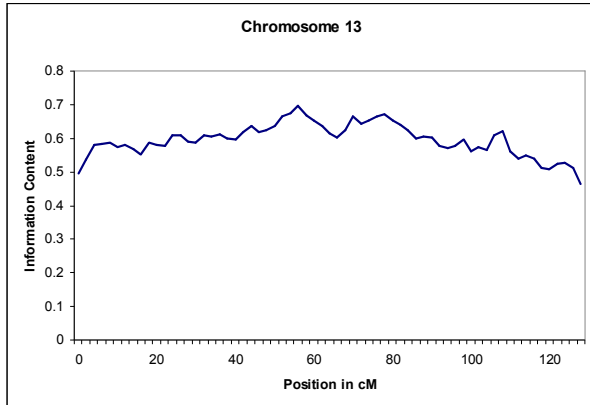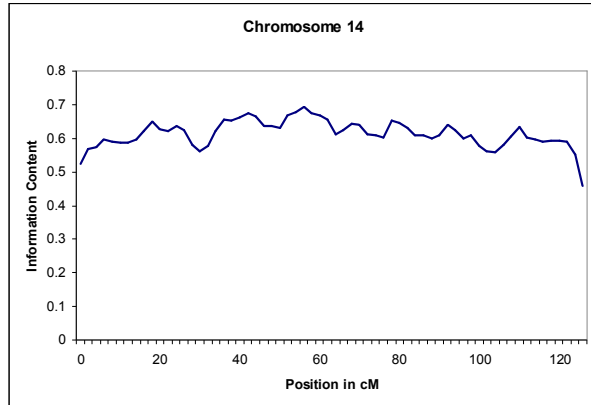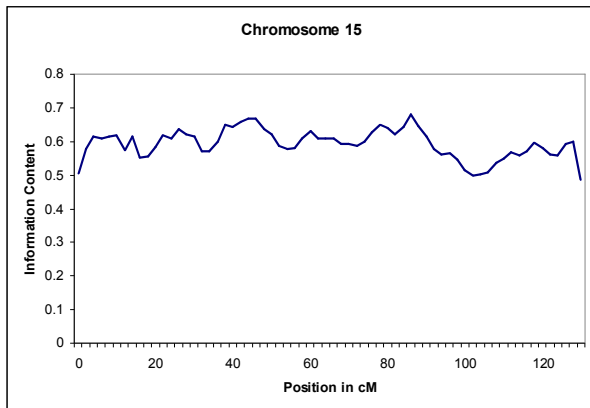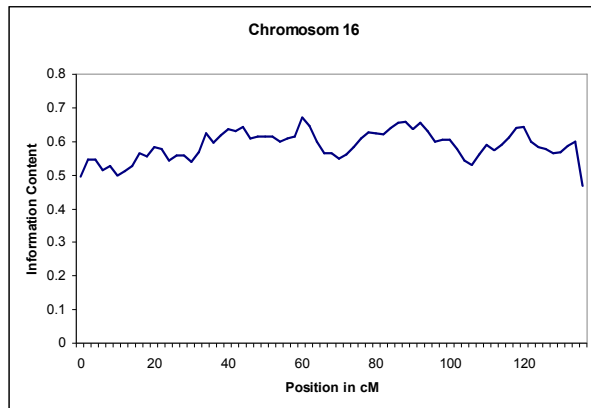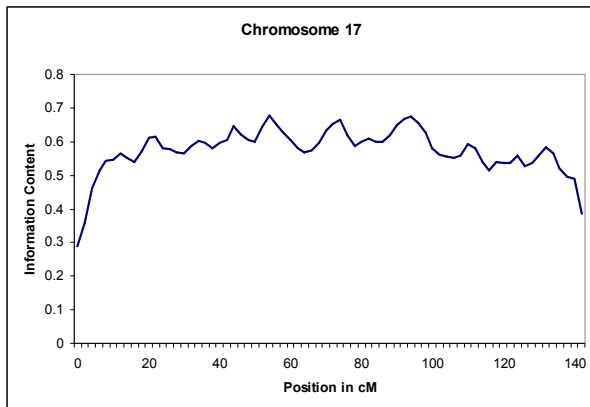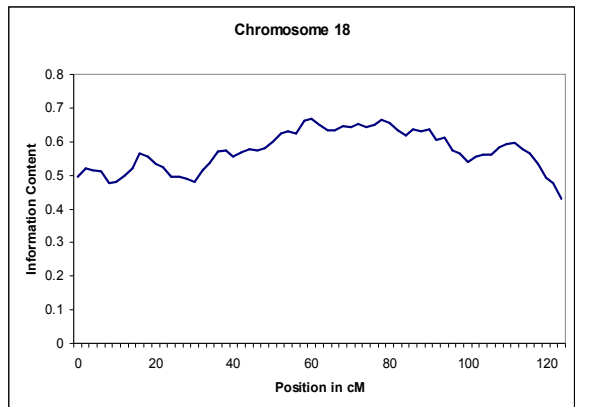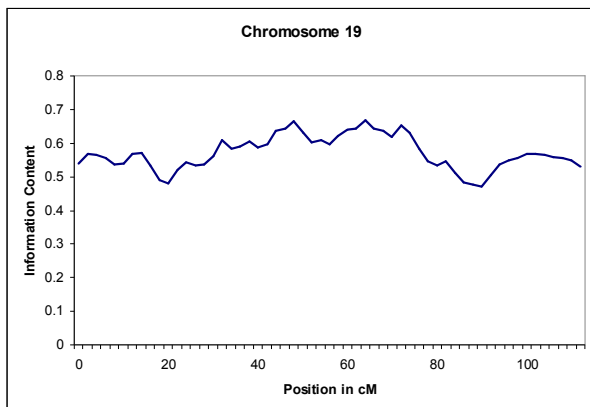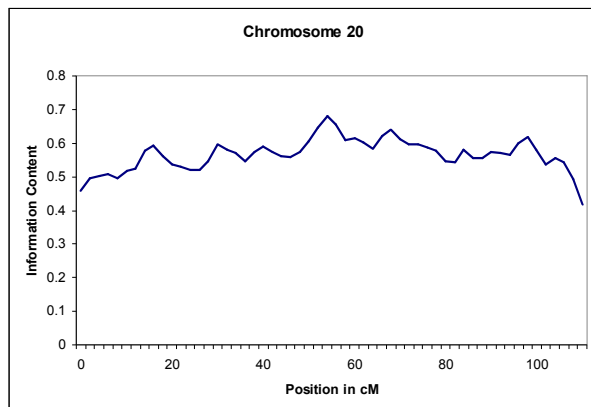

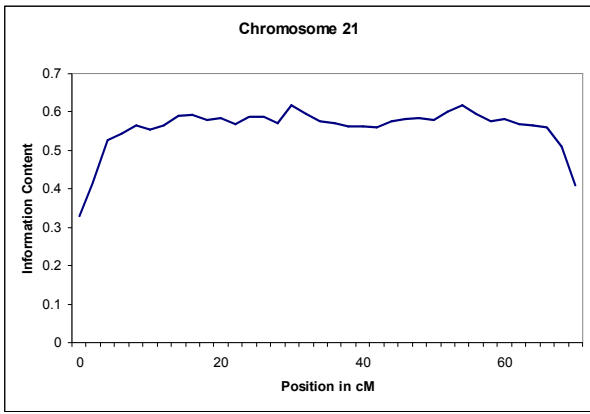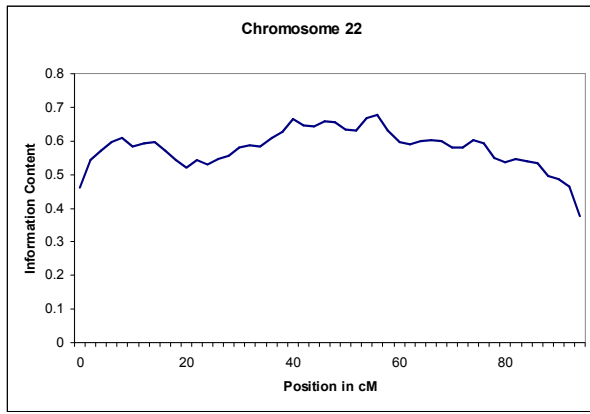

Supplement: NIHMS430189-supplement-Supp_Data_S1.pdf [file NIHMS430189-supplement-Supp_Data_S1.pdf]
